# Supplementary material for: Edible Bird’s Nest Supplementation Improves Male Reproductive Parameters of Sprague Dawley Rat
Source: PubMed Central journal article supplement (PMC8111441; doi:10.3389/fphar.2021.631402), 2021-03-30
Supplement: DataSheet1.pdf [file DataSheet1.pdf]

## *Supplementary Material*

### Supplementary Tables

**Supplementary Table 1** The step gradient and isocratic solvent composition for separation of EBN sample

| Time (min) | Acetonitrile | 0.1% Formic acid in Water |
|------------|--------------|---------------------------|
| 0          | 5.0          | 95.0                      |
| 5          | 5.0          | 95.0                      |
| 20         | 95.0         | 5.0                       |
| 25         | 95.0         | 5.0                       |
| 25         | 5.0          | 95.0                      |
| 30         | 5.0          | 95.0                      |

**Supplementary Table 2** Identification of the major EBN chromatogram peak from LC-MS analysis

| Peak | Rt (min) | m/z     | Molecular weight (g/mol) | Molecular formula                                             | Probable compound                                                      |
|------|----------|---------|--------------------------|---------------------------------------------------------------|------------------------------------------------------------------------|
| 1    | 1.51     | 118.000 | 117.15                   | C <sub>5</sub> H <sub>11</sub> NO <sub>2</sub>                | L-Valine                                                               |
| 2    | 1.76     | 160.842 | 161.27                   | C <sub>6</sub> H <sub>15</sub> NO <sub>2</sub> Si             | Trimethylsilyl l-Alanine                                               |
| 3    | 11.53    | 371.218 | 372.5                    | C <sub>23</sub> H <sub>32</sub> O <sub>4</sub>                | Testosterone, 3,17beta-bisAc                                           |
| 4    | 12.58    | 385.233 | 386.5                    | C <sub>24</sub> H <sub>34</sub> O <sub>4</sub>                | Progesterone 16,17-acetonide                                           |
| 5    | 12.84    | 187.097 | 186.18                   | C <sub>8</sub> H <sub>9</sub> NO <sub>4</sub>                 | 4-Pyridoxic Acid-d3                                                    |
| 6    | 13.73    | 201.113 | 202.25                   | C <sub>9</sub> H <sub>18</sub> N <sub>2</sub> O <sub>3</sub>  | L-Leucyl-L-alanine                                                     |
| 7    | 14.42    | 173.118 | 174.2                    | C <sub>6</sub> H <sub>14</sub> N <sub>4</sub> O <sub>2</sub>  | L-Arginine                                                             |
| 8    | 14.64    | 215.128 | 215.13                   | C <sub>6</sub> H <sub>8</sub> F <sub>3</sub> NO <sub>4</sub>  | (2S)-3-Hydroxy-2-methyl-2-[(2,2,2-trifluoroacetyl)amino]propanoic acid |
| 9    | 15.12    | 225.149 | 225.16                   | C <sub>8</sub> H <sub>10</sub> F <sub>3</sub> NO <sub>3</sub> | Proline, N-(trifluoroacetyl)-, methyl ester                            |
| 10   | 15.48    | 229.144 | 231.29                   | C <sub>11</sub> H <sub>21</sub> NO <sub>4</sub>               | N-(Tert-Butoxycarbonyl)-L-leucine                                      |
| 11   | 15.48    | 229.144 | 231.29                   | C <sub>11</sub> H <sub>21</sub> NO <sub>4</sub>               | N-(Tert-Butoxycarbonyl)-L-leucine                                      |
| 12   | 16.31    | 243.16  | 243.21                   | C <sub>10</sub> H <sub>13</sub> NO <sub>6</sub>               | L-(+)-Threose, aldononitrile, triacetate                               |
| 13   | 16.68    | 311.185 | 311.3                    | C <sub>18</sub> H <sub>17</sub> NO <sub>4</sub>               | Fmoc-beta-alanine                                                      |
| 14   | 16.86    | 207.139 | 209.67                   | C <sub>11</sub> H <sub>12</sub> ClNO                          | Vitamin K5 hydrochloride                                               |
| 15   | 17.15    | 257.175 | 259.3                    | C <sub>11</sub> H <sub>21</sub> N <sub>3</sub> O <sub>4</sub> | L-Glutaminyl-L-isoleucine                                              |
| 16   | 17.32    | 207.139 | 207.23                   | C <sub>11</sub> H <sub>13</sub> NO <sub>3</sub>               | Glycine, N-(m-toluoy)-, methyl esterl                                  |
| 17   | 17.47    | 309.17  | 309.27                   | C <sub>11</sub> H <sub>19</sub> NO <sub>9</sub>               | Sialic acid                                                            |
| 18   | 18       | 271.191 | 272.4                    | C <sub>18</sub> H <sub>24</sub> O <sub>2</sub>                | Estradiol                                                              |
| 19   | 18.12    | 293.175 | 293.89                   | CaI <sub>2</sub>                                              | Calcium iodide                                                         |
| 20   | 18.96    | 277.18  | 278.114                  | I <sub>2</sub> Mg                                             | Magnesium iodide                                                       |

**Supplementary Table 3** Organ coefficient (wet weight of organ (g)/body weight (g)) x 100

| <b>Group/Organ Coefficient</b> | <b>Testes</b> | <b>Epididymis</b> | <b>Seminal Vesicle</b> |
|--------------------------------|---------------|-------------------|------------------------|
| Control                        | 0.39 ± 0.02   | 0.16 ± 0.01       | 0.29 ± 0.01            |
| 10 mg/kg BW/d EBN              | 0.27 ± 0.04   | 0.13 ± 0.01       | 0.30 ± 0.05            |
| 50 mg/kg BW/d EBN              | 0.31 ± 0.02   | 0.13 ± 0.01       | 0.35 ± 0.03            |
| 250 mg/kg BW/d EBN             | 0.32 ± 0.03   | 0.14 ± 0.01       | 0.32 ± 0.04            |

Data are presented as Mean ± SEM with  $n=4$ . No significant different was noted between the groups for all organ coefficient.

## Supplementary Figure

## Full Scan

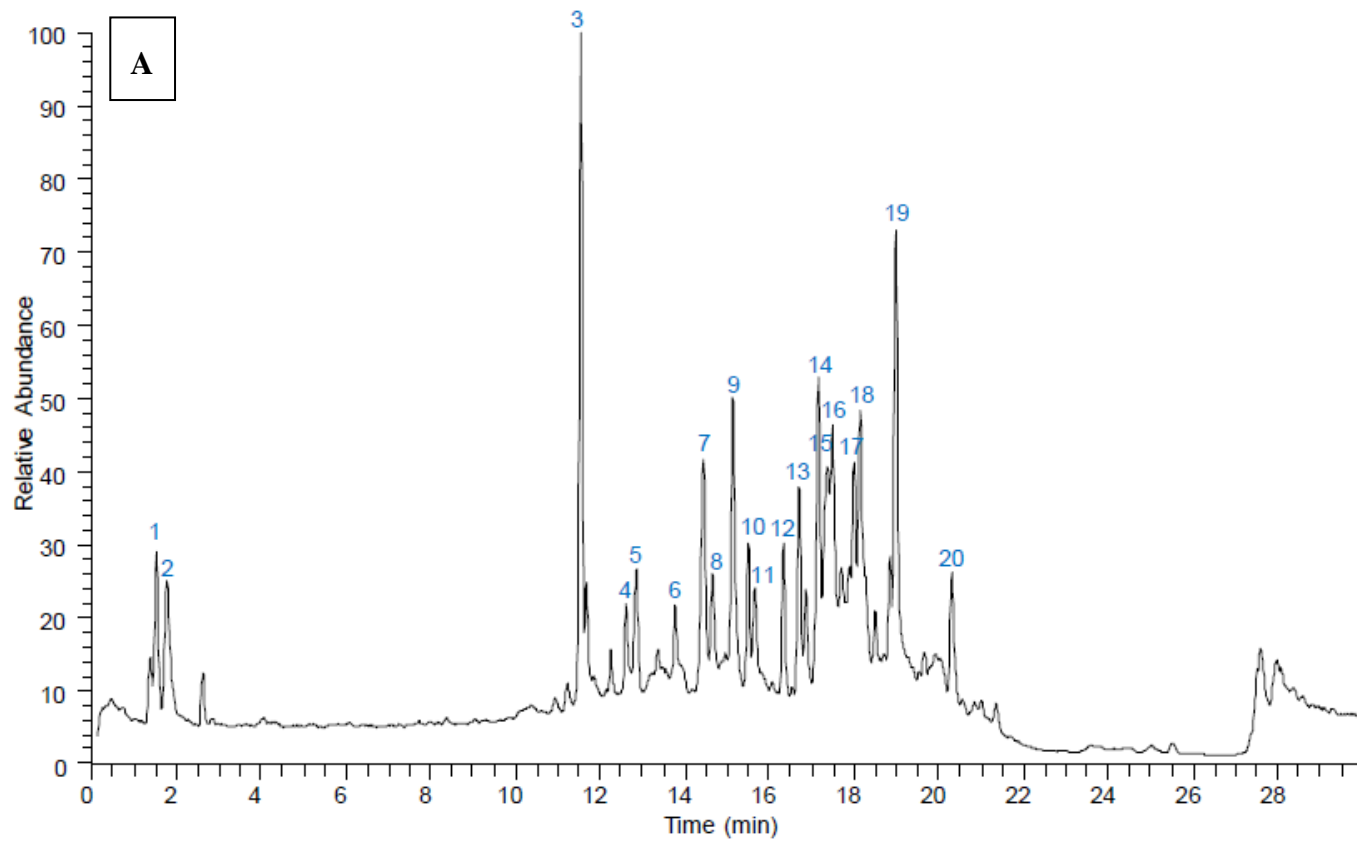

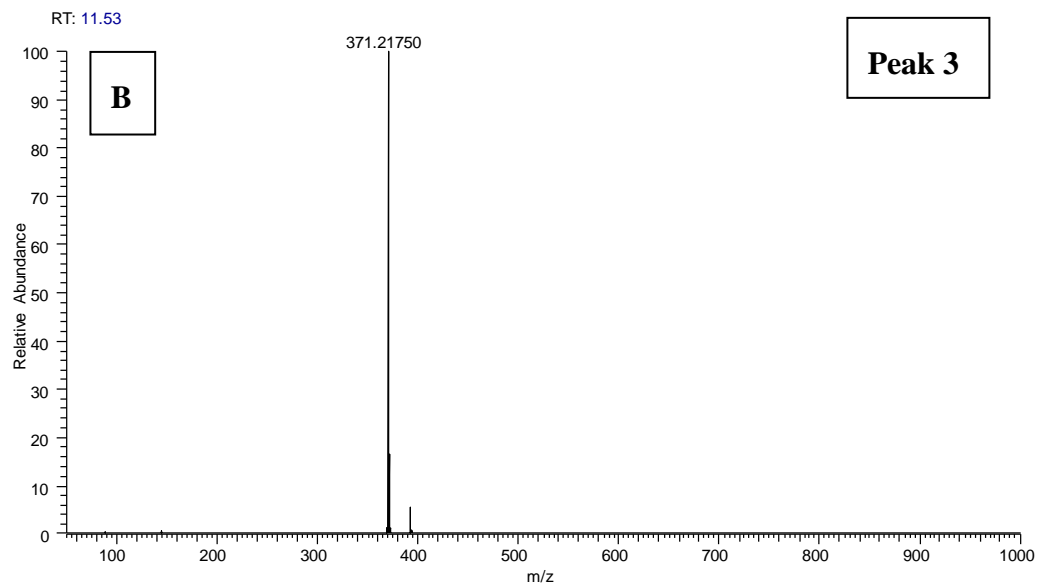

**Supplementary Figure 1.** Chromatogram of EBN compound characterization through LC-MS  
A represents full scan chromatogram of Orbitrap LCMS analysis  
B represents the most intensive peak in the mass spectrum

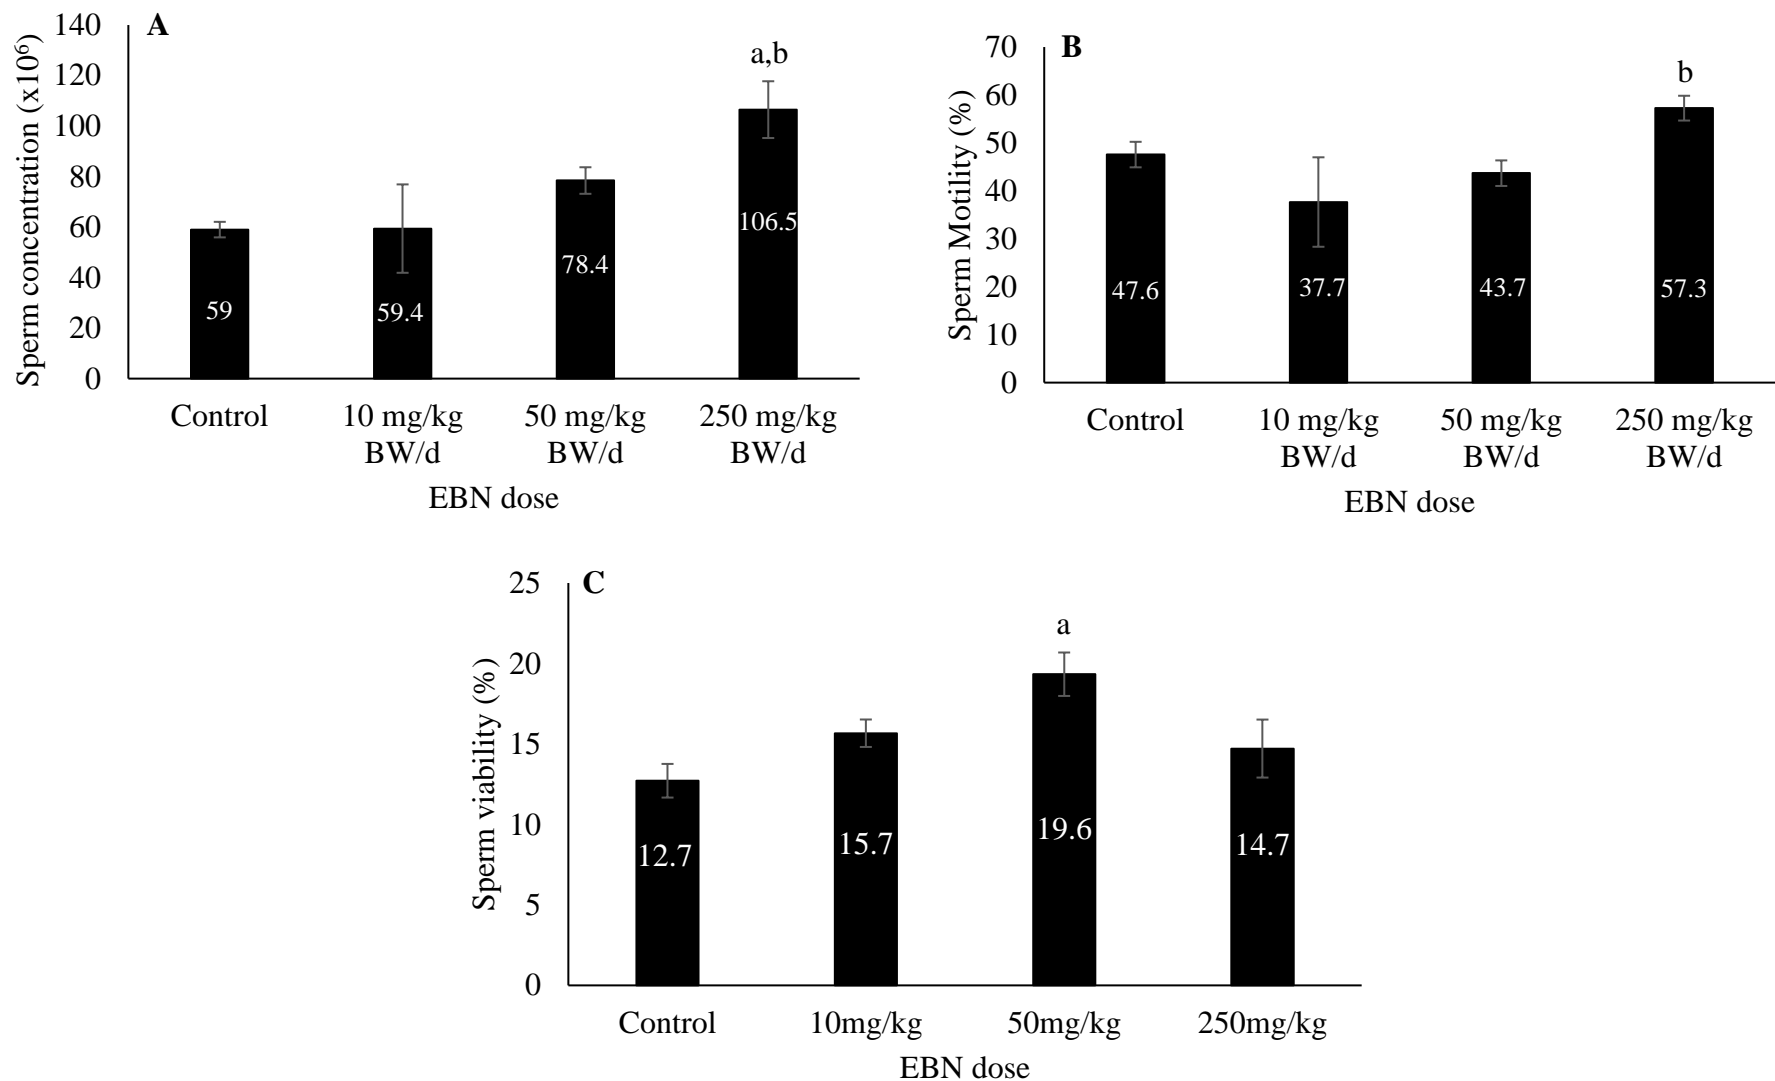

**Supplementary Figure 2.** The effect of EBN supplementation on sperm parameters.

A Sperm concentration with the respective dose of EBN treatment. Data are presented as Mean  $\pm$  SEM with n=4. <sup>a</sup> represents a significant difference compared to the Control group with  $p < 0.05$ ; <sup>b</sup> represents a significant difference compared to the 10 mg/kg BW/d EBN group with  $p < 0.05$ .

B Percentage of total motile sperm with the respective dose of EBN treatment. Data are presented as Mean  $\pm$  SEM with n=4. <sup>b</sup> represents a significant difference compared to the 10 mg/kg BW/d EBN group with p<0.05.

C Percentage of viable sperm with the respective dose of EBN treatment. Data are presented as Mean  $\pm$  SEM with n=4. <sup>a</sup> represents a significant difference compared to the Control group with p<0.05.

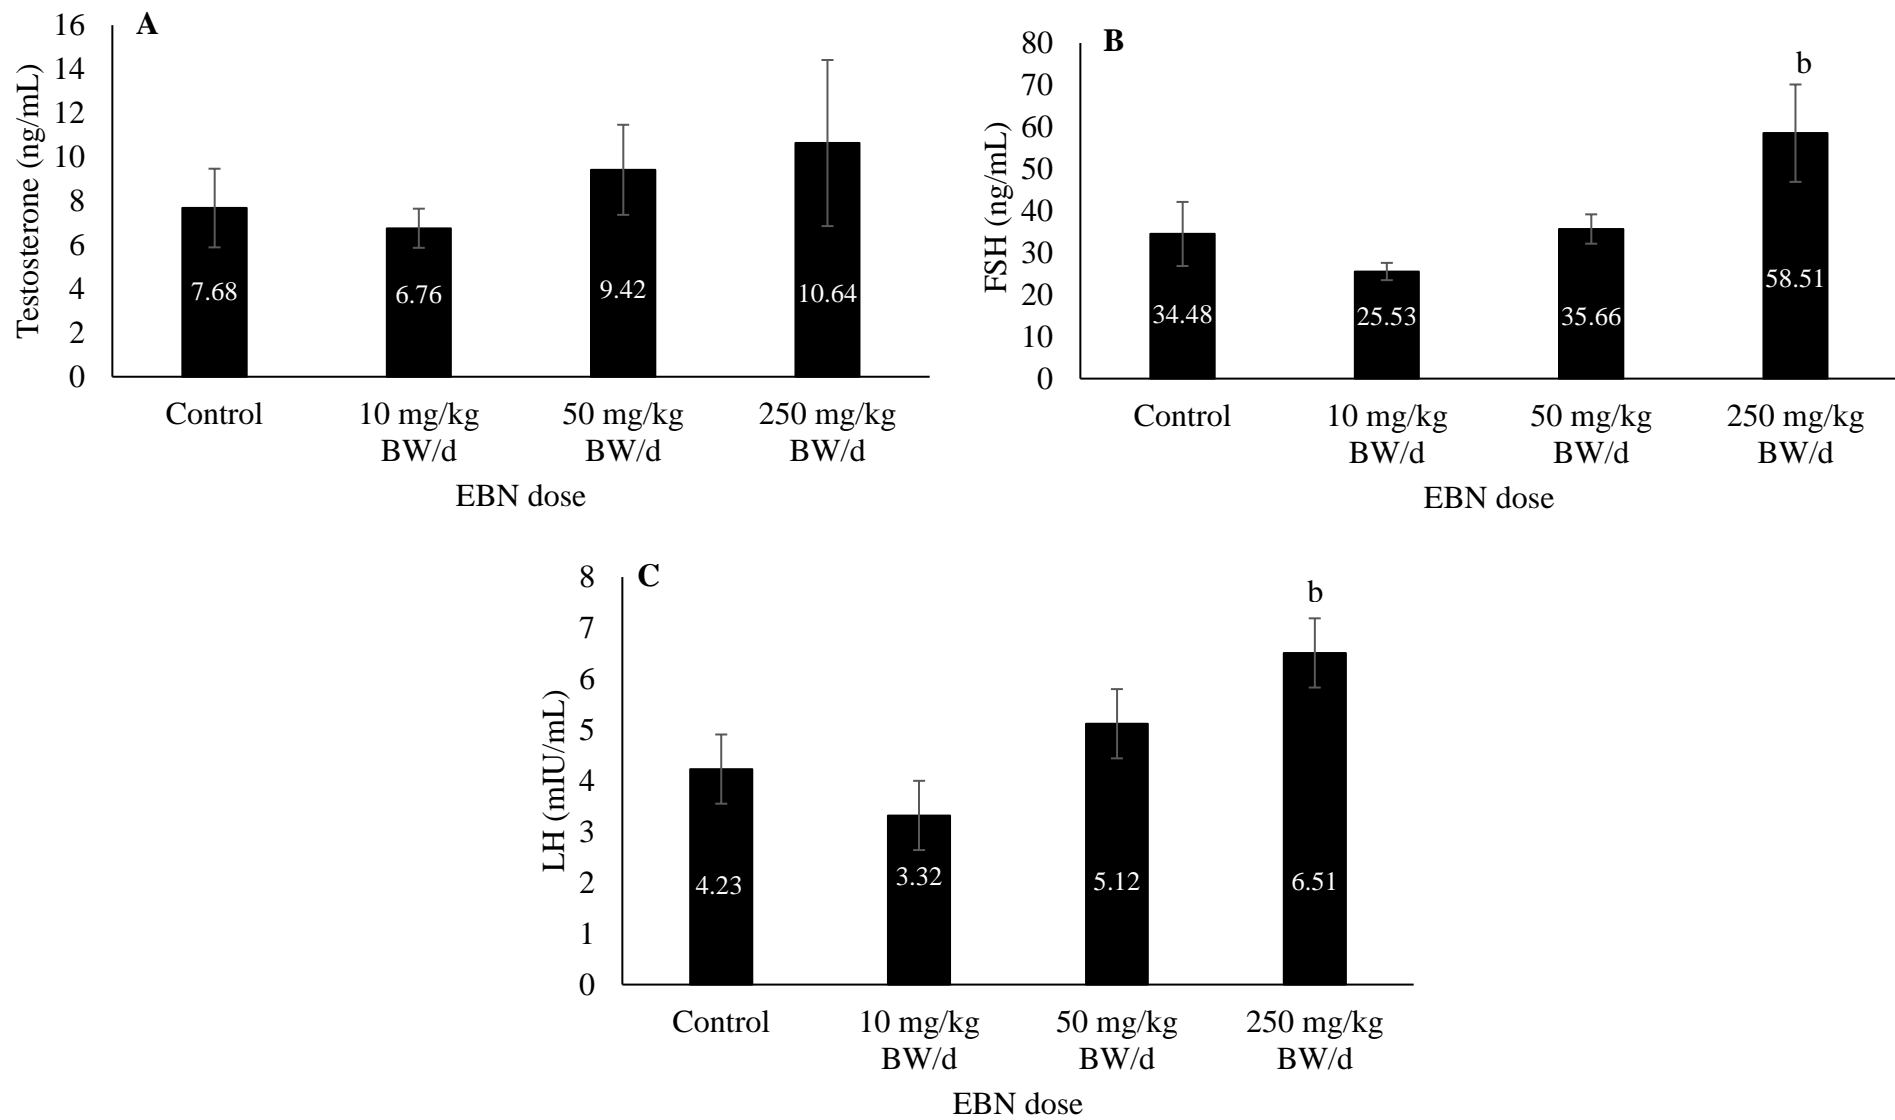

**Supplementary Figure 3.** The effect of EBN supplementation on serum hormonal level.



A Testosterone level in serum with a respective dose of EBN treatment. Data are presented as Mean  $\pm$  SEM with n=4. No significant difference between the groups was noted.

B FSH level in serum with a respective dose of EBN treatment. Data are presented as Mean  $\pm$  SEM with n=4. <sup>b</sup> represents a significant difference compared to the 10 mg/kg BW/d EBN group with p<0.05.

C LH level in serum with a respective dose of EBN treatment. Data are presented as Mean  $\pm$  SEM with n=4. <sup>b</sup> represents a significant difference compared to the 10 mg/kg BW/d EBN group with p<0.05.
